# Supplementary material
Source: PubMed Central journal article supplement (PMC10091495)
Supplement: tjac155_suppl_supplementary_data_s2.pdf [file tjac155_suppl_supplementary_data_s2.pdf]

Supplemental Data S2: Results from simple linear regression line fitting to log2 transformed cell density data from CxTr growth kinetics experiment.

| <b>Simple Linear Regression Results</b>       |                        |                   |                  |
|-----------------------------------------------|------------------------|-------------------|------------------|
| <b>Low Density (all points - dashed line)</b> |                        |                   |                  |
|                                               | <b>Best-fit values</b> | <b>Std. Error</b> | <b>95% CI</b>    |
| Slope                                         | 0.4044                 | 0.04003           | 0.3097 to 0.4991 |
| Y-intercept                                   | 11.94                  | 0.1906            | 11.49 to 12.39   |
| X-intercept                                   | -29.53                 |                   | -39.80 to -23.14 |
| Doubling time (1/slope)                       | 2.473                  |                   |                  |
| <b>Goodness of Fit</b>                        |                        |                   |                  |
| R squared                                     | 0.9358                 |                   |                  |
| Sy.x                                          | 0.3101                 |                   |                  |
| <b>Is slope significantly non-zero?</b>       |                        |                   |                  |
| F                                             | 102.1                  |                   |                  |
| DFn, Dfd                                      | 1, 7                   |                   |                  |
| p value                                       | <0.0001                |                   |                  |
| Deviation from zero?                          | Significant            |                   |                  |
| <b>Equation</b>                               |                        |                   |                  |
|                                               | Y=0.4044*X + 11.94     |                   |                  |
| <b>Data</b>                                   |                        |                   |                  |
| Number of X values                            | 9                      |                   |                  |
| Maximum number of Y replicates                | 1                      |                   |                  |
| Total number of values                        | 9                      |                   |                  |
| Number of missing values                      | 0                      |                   |                  |

| <b>Simple Linear Regression Results</b>                |                        |                   |                  |
|--------------------------------------------------------|------------------------|-------------------|------------------|
| <b>Intermediate Density (all points - dashed line)</b> |                        |                   |                  |
|                                                        | <b>Best-fit values</b> | <b>Std. Error</b> | <b>95% CI</b>    |
| Slope                                                  | 0.4543                 | 0.0386            | 0.3630 to 0.5456 |
| Y-intercept                                            | 13.33                  | 0.1838            | 12.90 to 13.77   |
| X-intercept                                            | -29.34                 |                   | -37/75 to -23.75 |
| Doubling time (1/slope)                                | 2.201                  |                   |                  |
| <b>Goodness of Fit</b>                                 |                        |                   |                  |
| R squared                                              | 0.9519                 |                   |                  |
| Sy.x                                                   | 0.299                  |                   |                  |
| <b>Is slope significantly non-zero?</b>                |                        |                   |                  |
| F                                                      | 138.5                  |                   |                  |
| DFn, Dfd                                               | 1, 7                   |                   |                  |
| p value                                                | <0.0001                |                   |                  |
| Deviation from zero?                                   | Significant            |                   |                  |
| <b>Equation</b>                                        |                        |                   |                  |
|                                                        | Y=0.4543*X + 13.33     |                   |                  |
| <b>Data</b>                                            |                        |                   |                  |
| Number of X values                                     | 9                      |                   |                  |
| Maximum number of Y replicates                         | 1                      |                   |                  |
| Total number of values                                 | 9                      |                   |                  |
| Number of missing values                               | 0                      |                   |                  |

| <b>Simple Linear Regression Results</b>        |                        |                   |                   |
|------------------------------------------------|------------------------|-------------------|-------------------|
| <b>High Density (all points - dashed line)</b> |                        |                   |                   |
|                                                | <b>Best-fit values</b> | <b>Std. Error</b> | <b>95% CI</b>     |
| Slope                                          | 0.4441                 | 0.01795           | 0.3979 to 0.49.02 |
| Y-intercept                                    | 15.31                  | 0.06473           | 15.15 to 15.48    |
| X-intercept                                    | -34.48                 |                   | -38.83 to -30.95  |
| Doubling time (1/slope)                        | 2.252                  |                   |                   |
| <b>Goodness of Fit</b>                         |                        |                   |                   |
| R squared                                      | 0.9919                 |                   |                   |
| Sy.x                                           | 0.095                  |                   |                   |
| <b>Is slope significantly non-zero?</b>        |                        |                   |                   |
| F                                              | 611.9                  |                   |                   |
| DFn, Dfd                                       | 1, 5                   |                   |                   |
| p value                                        | <0.0001                |                   |                   |
| Deviation from zero?                           | Significant            |                   |                   |
| <b>Equation</b>                                |                        |                   |                   |
|                                                | Y=0.4441*X + 15.31     |                   |                   |
| <b>Data</b>                                    |                        |                   |                   |
| Number of X values                             | 9                      |                   |                   |
| Maximun number of Y replicates                 | 1                      |                   |                   |
| Total number of values                         | 7                      |                   |                   |
| Number of missing values                       | 2                      |                   |                   |
